# Supplementary material
Source: PubMed Central journal article supplement (PMC2533410)
Supplement: supp_M800147-JLR200_Supp_rev_2.pdf [file supp_M800147-JLR200_Supp_rev_2.pdf]

# Supplemental Figure 1

A

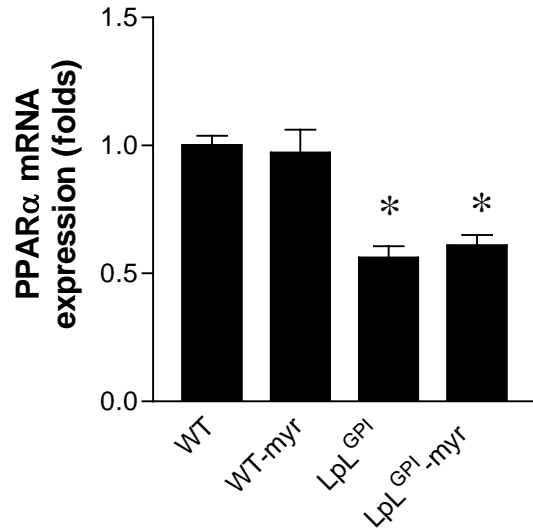

B

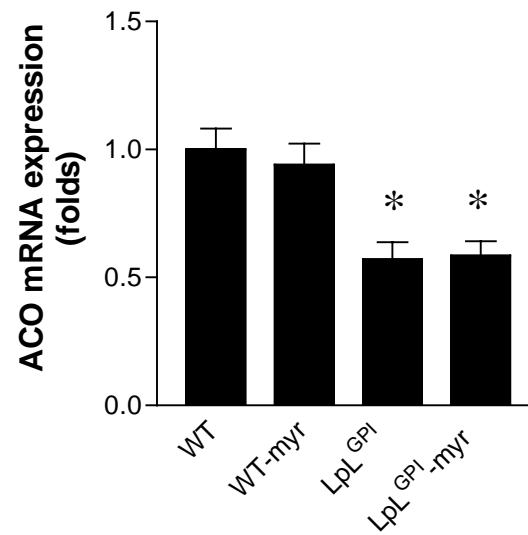

C

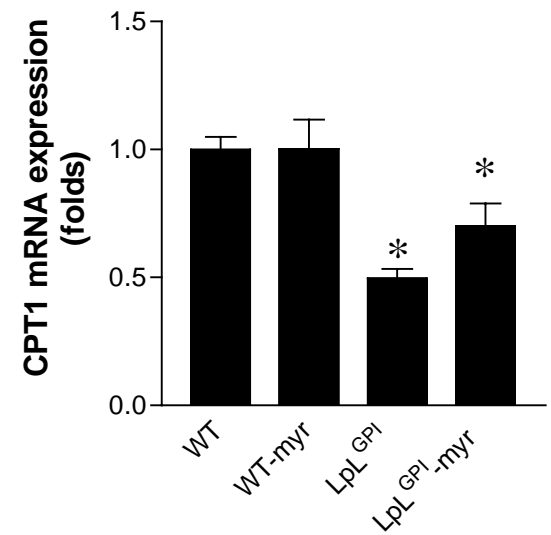

mRNA expression of PPAR $\alpha$ , ACO, and CPT1 in the heart was measured by RT-PCR as described in *Experiment Procedures*. n=5-6. Mean  $\pm$  SEM. \* $p$ <0.05 vs WT.

## Supplemental Figure 2

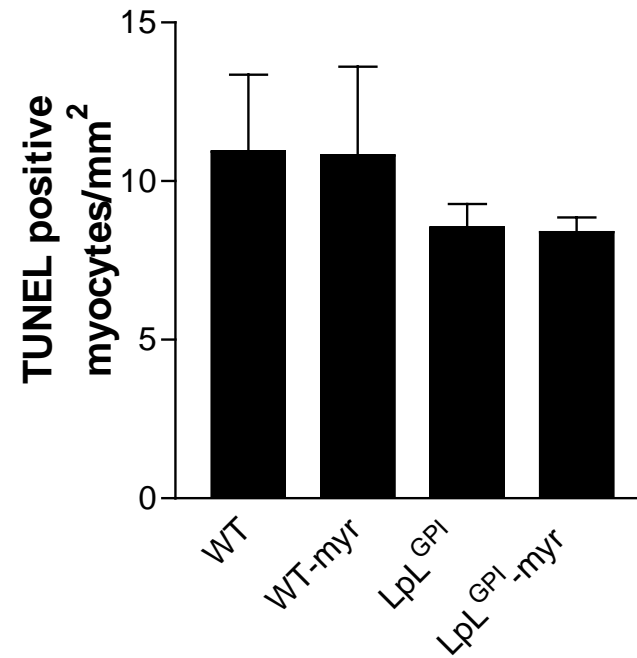

Sectioned heart tissues were stained for DNA fragmentation by a TUNEL staining. n=3. Mean  $\pm$  SEM.

## Supplemental Table 1. Primers for RT-PCR used in the Study

| Gene           | Direction  | Sequence                       |
|----------------|------------|--------------------------------|
| GLUT1          | sense      | 5'-TCGTAACGAGGAGAACCG-3'       |
|                | anti-sense | 5'-GGCCGTGTTGACGATA-3'         |
| GLUT4          | sense      | 5'-AGAGTCTAAAGCGCCT-3'         |
|                | anti-sense | 5'-CCGAGACCAACGTGAA-3'         |
| PDK4           | sense      | 5'-GACCGCTTAGTGAACAC-3'        |
|                | antisense  | 5'-GTAACGGGGTCCACTG-3'         |
| ANF            | sense      | 5'-CTTGTGGTGTGTACAG-3'         |
|                | antisense  | 5'-CCTTGGTGCTGAAGTT-3'         |
| BNP            | sense      | 5'-ATGCTACCCTTAGAGGC-3'        |
|                | antisense  | 5'-GTAAAGTGGGTTGGGC-3'         |
| $\beta$ -actin | sense      | 5'-GACGTTGACATCCGTAAAG-3'      |
|                | antisense  | 5'-CAGTAACAGTCCGCCT-3'         |
| CD-36          | sense      | 5'-ATTGGTCAAGCCAGCT-3'         |
|                | antisense  | 5'-TGTAGGCTCATCCACTAC-3'       |
| ACS1           | sense      | 5'-CTACGGACAGACCGAG-3'         |
|                | antisense  | 5'-GTCCCCCGTGTGTAAC-3'         |
| FATP1          | sense      | 5'-GGTCGTTTCTCCATTAATTCTCAT-3' |
|                | antisense  | 5'-CTAGAACTTTCCAGAAATGTTCC-3'  |
| LCB1           | sense      | 5'-AGTGGTGGGAGAGTCCCTTT-3'     |
|                | antisense  | 5'-CAGTGACCACAACCCTGATG-3'     |
| LCB2           | sense      | 5'-GGATACATCGGAGGCAAGAA-3'     |
|                | antisense  | 5'-ACCTGGTGTTCTCAGCCAAC-3'     |
